# Supplementary material for: Gas Chromatographic Fingerprint Analysis for the Comparison of Seized Cannabis Samples
Source: MDPI journal article supplement (doi:10.3390/molecules26216643), 2021-11-02
Supplement: s1 [file s1]

# Gas Chromatographic Fingerprint Analysis for the Comparison of Seized Cannabis Samples

Amorn Slosse <sup>1,2</sup>, Filip Van Durme <sup>1</sup>, Nele Samyn <sup>1</sup>, Debby Mangelings <sup>2</sup> and Yvan Vander Heyden <sup>2,\*</sup>

<sup>1</sup> Drugs and Toxicology Department, National Institute for Criminalistics and Criminology (NICC), Vilvoordsesteenweg 100, B-1120 Brussels, Belgium; amorn.slosse@just.fgov.be (A.S.); Filip.VanDurme@just.fgov.be (F.V.D.); Nele.samyn@just.fgov.be (N.S.)

<sup>2</sup> Department of Analytical Chemistry, Applied Chemometrics and Molecular Modelling, Vrije Universiteit Brussel (VUB), Laarbeeklaan 103, B-1090 Brussels, Belgium; Debby.Mangelings@vub.be

\* Correspondence: yvanvdh@vub.be

**Abstract:** *Cannabis sativa* L. is widely applied as recreational illegal drugs. Illicit cannabis profiling, comparing seized samples, is challenging because of the natural Cannabis heterogeneity. The aim of this study is to use GC-FID and GC-MS herbal fingerprints for intra (within)- and inter (between)-location variabilities evaluation. This study focuses on finding an acceptable threshold to link seized samples. Through Pearson correlation-coefficient calculations between intra-location samples, 'linked' thresholds were derived using 95% and 99% confidence limits. False negative (FN) and false positive (FP) error rate calculations, aiming at getting the lowest possible FP value, were performed for different data pretreatments. Fingerprint-alignment parameters were optimized using Automated Correlation Optimized Warping (ACOW) or Design of Experiments (DoE), which resulted in similar results. Hence, ACOW data, as reference, showed 54% and 65% FP values (95/99% confidence). Additional fourth root normalization pretreatment provided the best results for both the GC-FID and GC-MS data sets. For GC-FID, which showed the best improved FP error rate, 54/65% FP for the reference data decreased to 24 and 32% after fourth root transformation. Cross validation showed similar FP values as the entire calibration set, indicating the representativeness of the thresholds. A noteworthy improvement in discrimination between seized Cannabis samples could be concluded.

**Keywords:** Chromatographic fingerprint; alignment optimization; design of experiments; data preprocessing; comparison intra- and inter-location samples

**Citation:** Slosse, A.; Van Durme, F.; Samyn, N.; Mangelings, D.; Vander Heyden, Y. Gas chromatographic fingerprint analysis for the comparison of seized cannabis samples *Molecules* **2021**, *26*, 6643. <https://doi.org/10.3390/molecules26216643>

Academic Editor: Michal Daszykowski, Joaquim Jaumot, Hadi Parastar

Received: 30 September 2021

Accepted: 26 October 2021

Published: 2 November 2021

**Publisher's Note:** MDPI stays neutral with regard to jurisdictional claims in published maps and institutional affiliations.

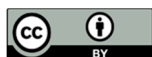

**Copyright:** © 2021 by the authors. Licensee MDPI, Basel, Switzerland. This article is an open access article distributed under the terms and conditions of the Creative Commons Attribution (CC BY) license (<http://creativecommons.org/licenses/by/4.0/>).

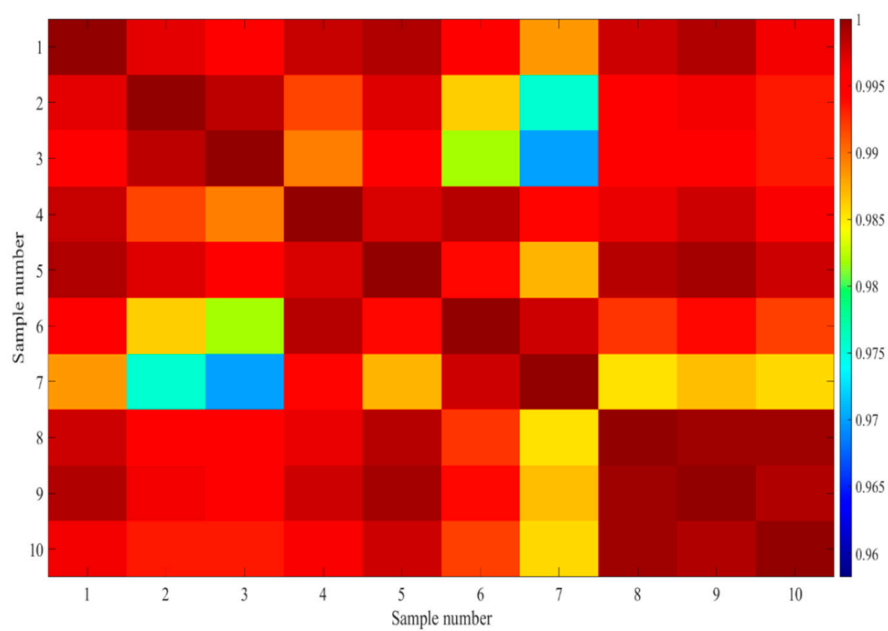

**Figure S1.** Intra-correlation coefficients colour map from the 8<sup>th</sup> cultivation site. GC-FID data were used.

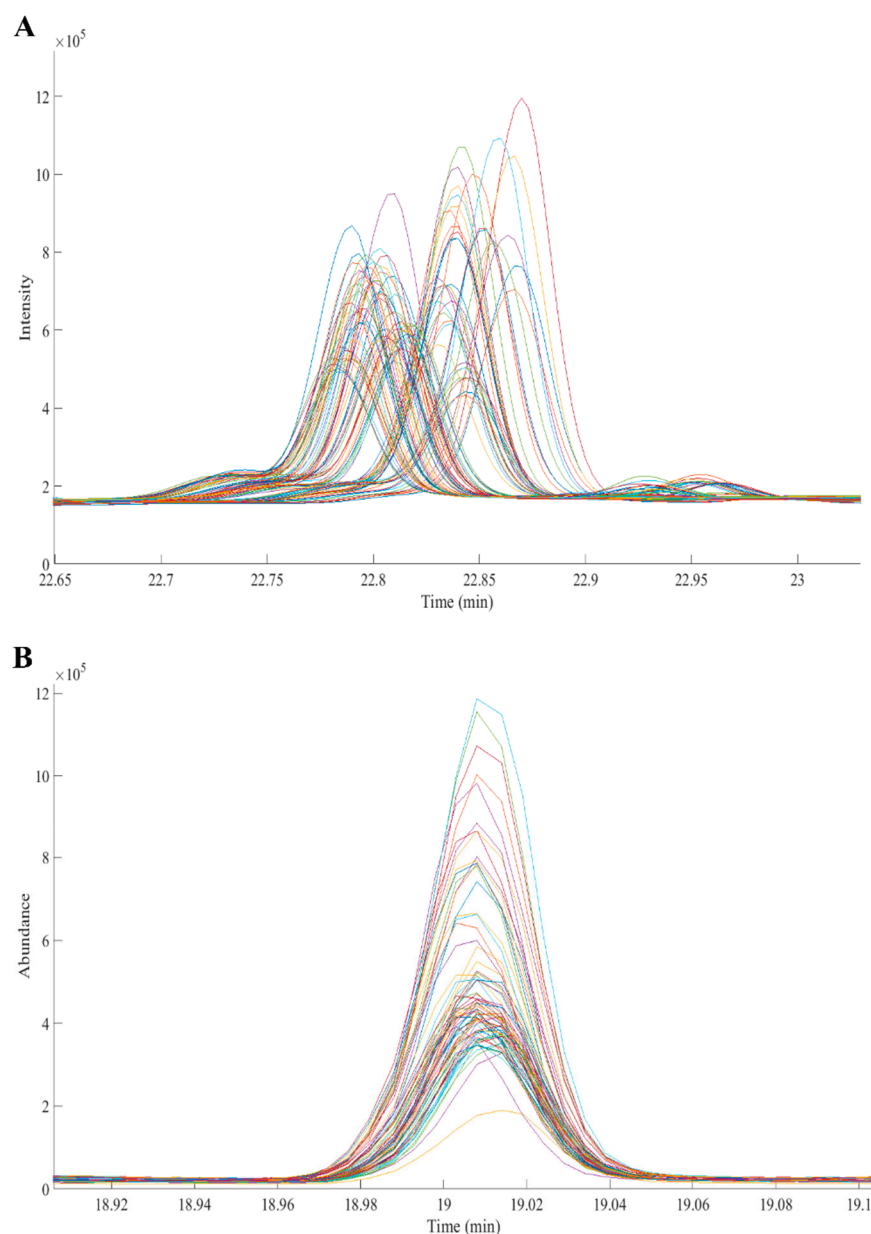

**Figure S2.** A detail plot of one peak for (A) GC-FID raw data, and (B) GC-MS TIC raw data for the 10 different cultivation sites.

**Table S1.** Summary of the FN and FP values of GC-FID Cannabis fingerprints for the ACOW and DoE approach. The effect of multiple alignments are also shown. The best FP error rates are denoted in bold.

|                                      | 95% CL |           | 99% CL |           |
|--------------------------------------|--------|-----------|--------|-----------|
|                                      | FN (%) | FP (%)    | FN (%) | FP (%)    |
| <b>Raw Data</b>                      | 6      | 34        | 3      | 39        |
| <b>Range SL 15-100 &amp; SS 1-10</b> |        |           |        |           |
| 1 x ACOW                             | 6      | 57        | 4      | 65        |
| 2 x ACOW                             | 6      | <b>47</b> | 4      | <b>55</b> |
| 3 x ACOW                             | 5      | 49        | 4      | 58        |
| 1 x DoE                              | 5      | <b>47</b> | 3      | <b>55</b> |
| 2 x DoE                              | 4      | 58        | 3      | 65        |
| 3 x DoE                              | 6      | 50        | 4      | 59        |

| <b>Range SL 25-200 &amp; SS 1-10</b> |   |           |   |           |
|--------------------------------------|---|-----------|---|-----------|
| 1 x ACOW                             | 6 | 58        | 4 | 63        |
| 2 x ACOW                             | 5 | 54        | 4 | 62        |
| 3 x ACOW                             | 5 | 66        | 2 | 75        |
| 1 x DoE                              | 6 | 58        | 4 | 60        |
| 2 x DoE                              | 5 | 57        | 3 | 62        |
| 3 x DoE                              | 4 | <b>49</b> | 3 | <b>55</b> |

**Table S2.** Representation of the alignment optimization on the GC-MS raw data. The warping effect is expressed as the obtained FN and FP error rates.

|                                      | <b>95% CL</b> |        | <b>99% CL</b> |        |
|--------------------------------------|---------------|--------|---------------|--------|
|                                      | FN (%)        | FP (%) | FN (%)        | FP (%) |
| <b>Raw Data</b>                      | 4             | 53     | 3             | 58     |
| <b>Range SL 15-100 &amp; SS 1-10</b> |               |        |               |        |
| 1 x ACOW                             | 7             | 53     | 3             | 58     |
| 1 x DoE                              | 7             | 53     | 3             | 58     |
| <b>Range SL 25-200 &amp; SS 1-10</b> |               |        |               |        |
| 1 x ACOW                             | 6             | 54     | 2             | 57     |
| 1 x DoE                              | 6             | 54     | 3             | 57     |

**Table S3.** The obtained total % FN and FP for all pretreatment techniques after aligning the GC-FID raw data twice using ACOW.

| <b>Pre-treatment method</b>                  | <b>95% CL</b> |        | <b>99% CL</b> |        |
|----------------------------------------------|---------------|--------|---------------|--------|
|                                              | FN (%)        | FP (%) | FN (%)        | FP (%) |
| <b>Aligned data (2xACOW)</b>                 | 6             | 47     | 3             | 55     |
| <b>Column centering (CC)</b>                 | 9             | 55     | 6             | 63     |
| <b>Normalization + CC (N+CC)</b>             | 7             | 54     | 4             | 67     |
| <b>Standard normal variate + CC (SNV+CC)</b> | 7             | 52     | 4             | 66     |
| <b>Square root normalization</b>             | 7             | 29     | 3             | 38     |
| <b>Fourth root normalization</b>             | 7             | 24     | 4             | 32     |
| <b>Auto-scaling</b>                          | 6             | 19     | 4             | 27     |

**Table S4.** Total % FN and FP for all pretreatment techniques after removal of THC of the aligned GC-FID data matrix.

| <b>Pre-treatment method</b>                  | <b>95% CL</b> |        | <b>99% CL</b> |        |
|----------------------------------------------|---------------|--------|---------------|--------|
|                                              | FN (%)        | FP (%) | FN (%)        | FP (%) |
| <b>Aligned data (1xACOW)</b>                 | 6             | 57     | 4             | 65     |
| <b>Column centering (CC)</b>                 | 7             | 31     | 3             | 42     |
| <b>Normalization + CC (N+CC)</b>             | 4             | 29     | 3             | 40     |
| <b>Standard normal variate + CC (SNV+CC)</b> | 7             | 29     | 3             | 38     |
| <b>Square root normalization</b>             | 5             | 30     | 4             | 40     |
| <b>Fourth root normalization</b>             | 5             | 28     | 4             | 37     |
| <b>Auto-scaling</b>                          | 6             | 19     | 4             | 27     |
